# Supplementary material for: Effectiveness and safety of apixaban versus warfarin in non-valvular atrial fibrillation patients in “real-world” clinical practice: A propensity-matched analysis of 76,940 patients
Source: PubMed Central journal article supplement — Thromb Haemost. 2017 Nov 28;117(6):1072–82. doi: 10.1160/TH17-01-0068 (PMC6291856; doi:10.1160/th17-01-0068), 2017-11-28
Supplement: 10-1160-th17-01-0068-supp.pdf [file 10-1160-th17-01-0068-supp.pdf]

**Supplementary Material to Li et al. “Effectiveness and safety of apixaban versus warfarin in non-valvular atrial fibrillation patients in “real-world” clinical practice. A propensity-matched analysis of 76,940 patients” (<https://doi.org/10.1160/TH17-01-0068>)**

**Suppl. Table 1. ICD-9-CM Codes for Stroke/SE and Major Bleeding Endpoints**

| <b>Diagnosis</b>                      | <b>ICD-9 Diagnosis and Procedure Codes</b>                                                                                                                                                                                                                                                                       |
|---------------------------------------|------------------------------------------------------------------------------------------------------------------------------------------------------------------------------------------------------------------------------------------------------------------------------------------------------------------|
| Hemorrhagic Stroke                    | 430.xx-432.xx<br><br>Cases were excluded if traumatic brain injury (ICD-9: 800–804, 850–854) was present during hospitalization.                                                                                                                                                                                 |
| Ischemic Stroke                       | 433.x1, 434.x1, 436                                                                                                                                                                                                                                                                                              |
| Systemic Embolism                     | 444.x, 445.x                                                                                                                                                                                                                                                                                                     |
| Major Gastrointestinal bleeding event | 456.0, 456.20, 530.82, 531.0x, 531.2x, 531.4x, 531.6x, 532.0x, 532.2x, 532.4x, 532.6x, 533.0x, 533.2x, 533.4x, 533.6x, 534.0x, 534.2x, 534.4x, 534.6x, 535.01, 535.11, 535.21, 535.31, 535.41, 535.51, 535.61, 537.83, 562.02, 562.03, 562.12, 562.13, 568.81, 569.3, 569.85, 578.x<br><br>Procedure Code: 44.43 |
| Major Intracranial Hemorrhage (ICH)   | 430, 431, 432.0, 432.1, 432.9, 852.0x, 852.2x, 852.4x, 853.0x,                                                                                                                                                                                                                                                   |
| Major Other hemorrhage                | 285.1, 360.43, 362.43, 362.81, 363.61, 363.62, 363.72, 364.41, 372.72, 374.81, 376.32, 377.42, 379.23, 423.0x, 596.7x, 599.7x, 602.1x, 620.1, 621.4, 626.2, 626.5, 626.7, 626.8, 626.9, 719.1x, 782.7, 784.7, 784.8, 786.3x, 958.2, 997.02, 998.11<br><br>Procedure codes: 99.04                                 |

Suppl. Table 2. Comparison between ARISTOTLE Trial and This “Real-World” Study

|                                            | ARISTOTLE<br>Apixaban<br>(N=9,120) | ARISTOTLE<br>Warfarin<br>(N=9,081) | Pooled<br>analysis<br>Apixaban<br>(N=38,470) | Pooled<br>analysis<br>Warfarin<br>(N=38,470) |
|--------------------------------------------|------------------------------------|------------------------------------|----------------------------------------------|----------------------------------------------|
| <b>Age (years)</b>                         |                                    |                                    |                                              |                                              |
| <b>Median</b>                              | 70                                 | 70                                 | 71                                           | 71                                           |
| <b>IQR</b>                                 | 63–76                              | 63–76                              | 62–80                                        | 62–80                                        |
| <b>≥75 – no. (%)</b>                       | 2,850 (31.2)                       | 2,828 (31.1)                       | 15,640 (40.7)                                | 15,564 (40.5)                                |
| <b>Female – no. (%)</b>                    | 3,234 (35.5)                       | 3,182 (35.0)                       | 15,524 (40.4)                                | 15,455 (40.2)                                |
| <b>CHADS<sub>2</sub> Score – mean ± SD</b> |                                    |                                    |                                              |                                              |
| <b>Mean</b>                                | 2.1±1.1                            | 2.1±1.1                            | 2.1±1.3                                      | 2.1±1.3                                      |
| <b>Distribution – no. (%)</b>              |                                    |                                    |                                              |                                              |
| <b>0–1</b>                                 | 3,100 (34.0)                       | 3,083 (34.0)                       | 13,903 (36.1)                                | 13,595 (35.3)                                |
| <b>2</b>                                   | 3,262 (35.8)                       | 3,254 (35.8)                       | 12,002 (31.2)                                | 12,542 (32.6)                                |
| <b>≥3</b>                                  | 2,758 (30.2)                       | 2,744 (30.2)                       | 12,565 (32.7)                                | 12,333 (32.1)                                |
| <b>Bleeding History – no. (%)</b>          | 1,525 (16.7)                       | 1,515 (16.7)                       | 6,393 (16.6)                                 | 6,303 (16.4)                                 |
| <b>Prior Stroke/SE/TIA – no. (%)</b>       | 1,748 (19.2)                       | 1,790 (19.7)                       | 4,845 (12.6)                                 | 4,786 (12.4)                                 |
| <b>Congestive Heart Failure – no. (%)</b>  | 3,235 (35.5)                       | 3,216 (35.4)                       | 9,320 (24.2)                                 | 9,210 (23.9)                                 |
| <b>Diabetes – no. (%)</b>                  | 2,284 (25.0)                       | 2,263 (24.9)                       | 12,501 (32.5)                                | 12,629 (32.8)                                |
| <b>Hypertension – no. (%)</b>              | 7,962 (87.3)                       | 7,954 (87.6)                       | 31,752 (82.5)                                | 31,762 (82.3)                                |
| <b>Myocardial Infarction – no. (%)</b>     | 1,319 (14.5)                       | 1,266 (13.9)                       | 3,424 (8.9)                                  | 3,372 (8.8)                                  |
